# Supplementary material for: Isostructural relations in dihalomethanes and disproportionation of bromoiodomethane
Source: Royal Society of Chemistry journal article supplement (doi:10.1039/b805065a), 2008-01-01
Supplement: b805065a.pdf [file b805065a.pdf]

## Supplementary Information: Isostructural relations in dihalomethanes and disproportionation of bromiodomethane

Marcin Podsiadło<sup>a</sup> and Andrzej Katrusiak<sup>a\*</sup>

<sup>a</sup>Faculty of Chemistry, Adam Mickiewicz University, Grunwaldzka 6, 60-780 Poznań, Poland.

\*E-mail: katran@amu.edu.pl

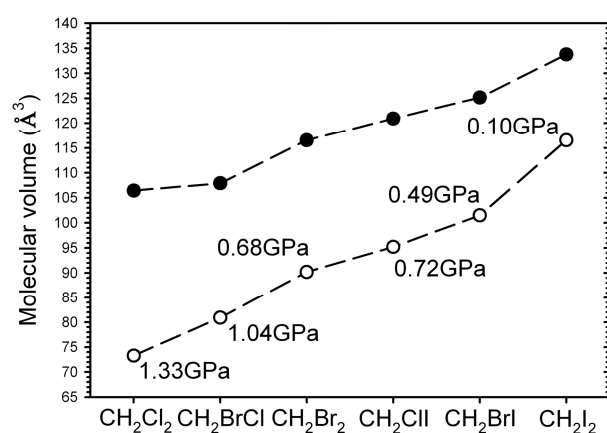

**Figure S1.** Molecular volume as a function of pressure for dihalomethanes. Full circles represent data calculated at 295 K/0.10 MPa, while open ones those measured at freezing pressures.

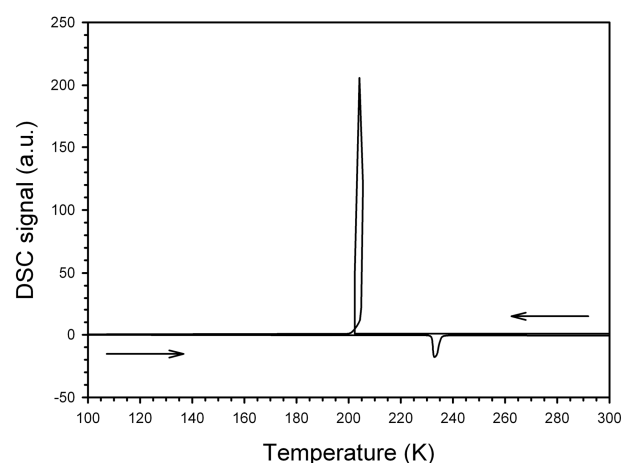

**Figure S2.** Differential scanning calorimetry thermograph for 6.78mg of CH<sub>2</sub>BrI performed in the 300–100 K range with a rate of 10 K·min<sup>-1</sup>. The arrows indicate the direction of the temperature changes.

**Table S1.** Atomic coordinates ( $\cdot 10^4$ ),  $U_{\text{eq}}$  and  $U_{\text{iso}}$  ( $\text{\AA}^2 \cdot 10^3$ ) for  $\text{CH}_2\text{BrI}$  and  $\text{CH}_2\text{I}_2$  phase II.

| Atom                                                  | $x/a$   | $y/b$    | $z/c$    | $U_{\text{eq}}/U_{\text{iso}}$ |
|-------------------------------------------------------|---------|----------|----------|--------------------------------|
| <b><math>\text{CH}_2\text{BrI}</math> at 220 K</b>    |         |          |          |                                |
| I1/Br1                                                | 945(1)  | 6690(2)  | 1319(1)  | 52(1)                          |
| I2/Br2                                                | 3547(1) | 6451(2)  | 1290(1)  | 52(1)                          |
| C1                                                    | 2111(8) | 4279(2)  | 1069(2)  | 52(3)                          |
| H1                                                    | 1753(2) | 3501(9)  | 407(3)   | 63                             |
| H2                                                    | 2305(2) | 2403(2)  | 1460(3)  | 63                             |
| <b><math>\text{CH}_2\text{BrI}</math> at 100 K</b>    |         |          |          |                                |
| I1/Br1                                                | 925(1)  | 6803(1)  | 1311(1)  | 23(1)                          |
| I2/Br2                                                | 3559(1) | 6587(2)  | 1289(1)  | 24(1)                          |
| C1                                                    | 2132(5) | 4241(2)  | 1072(2)  | 30(2)                          |
| H1                                                    | 1757(2) | 3625(10) | 381(3)   | 36                             |
| H2                                                    | 2352(2) | 2537(3)  | 1548(3)  | 36                             |
| <b><math>\text{CH}_2\text{BrI}</math> at 0.54 GPa</b> |         |          |          |                                |
| I1/Br1                                                | 880(1)  | 6780(1)  | 1295(1)  | 53(1)                          |
| I2/Br2                                                | 3541(1) | 6561(1)  | 1304(1)  | 53(1)                          |
| C1                                                    | 2082(5) | 4280(1)  | 1069(2)  | 63(10)                         |
| H1                                                    | 1772(2) | 3478(10) | 389(4)   | 75                             |
| H2                                                    | 2280(2) | 2409(2)  | 1491(3)  | 75                             |
| <b><math>\text{CH}_2\text{I}_2</math> at 0.80 GPa</b> |         |          |          |                                |
| I1                                                    | 0       | 1376(1)  | 2665(1)  | 45(3)                          |
| C1                                                    | 0       | 0        | -288(2)  | 64(93)                         |
| H1                                                    | 1328(1) | 0        | -1138(2) | 84                             |
